# Supplementary material for: Cd(NH2SO3)2·xH2O (x= 0, 2): new sulfamates with a unique coordination environment and reversible phase transitions
Source: Royal Society of Chemistry journal article supplement (doi:10.1039/d2qi02479a), 2022-12-13
Supplement: d2qi02479a1.pdf [file d2qi02479a1.pdf]

Electronic Supplementary Information (ESI) for

**Cd(NH<sub>2</sub>SO<sub>3</sub>)<sub>2</sub>·xH<sub>2</sub>O (x = 0, 2): new sulfamates with unique coordination environment and reversible phase transitions**

Xuefei Wang, Jihyun Lee, Yang Li, Yunseung Kuk and Kang Min Ok\*

**Table of contents**

|                                                                                                                                                  |            |
|--------------------------------------------------------------------------------------------------------------------------------------------------|------------|
| <b>Figure S1.</b> As-grown single crystals of Cd(SO <sub>3</sub> NH <sub>2</sub> ) <sub>2</sub> ·2H <sub>2</sub> O.....                          | <b>S2</b>  |
| <b>Figure S2.</b> Rietveld refinements .....                                                                                                     | <b>S2</b>  |
| <b>Figure S3.</b> Pawley phase fitting for the annealed Cd(SO <sub>3</sub> NH <sub>2</sub> ) <sub>2</sub> ·2H <sub>2</sub> O sample.....         | <b>S3</b>  |
| <b>Figure S4.</b> SEM-EDX.....                                                                                                                   | <b>S3</b>  |
| <b>Figure S5.</b> The converted UV-vis spectra by using Kubelka-Munk function.....                                                               | <b>S4</b>  |
| <b>Figure S6.</b> Electronic band structures.....                                                                                                | <b>S5</b>  |
| <b>Figure S7.</b> Calculated birefringence.....                                                                                                  | <b>S6</b>  |
| <b>Table S1.</b> Crystallographic data.....                                                                                                      | <b>S7</b>  |
| <b>Table S2.</b> Fractional atomic coordinates, equivalent isotropic displacement parameters and bond valence sum (BVS) for the non-H atoms..... | <b>S8</b>  |
| <b>Table S3.</b> Selected bond lengths (Å) and angles (°) for Cd(SO <sub>3</sub> NH <sub>2</sub> ) <sub>2</sub> ·2H <sub>2</sub> O.....          | <b>S8</b>  |
| <b>Table S4.</b> Selected bond lengths (Å) and angles (°) for Cd(SO <sub>3</sub> NH <sub>2</sub> ) <sub>2</sub> .....                            | <b>S9</b>  |
| <b>Table S5.</b> Hydrogen Bonds for Cd(SO <sub>3</sub> NH <sub>2</sub> ) <sub>2</sub> ·2H <sub>2</sub> O.....                                    | <b>S9</b>  |
| <b>Table S6.</b> Hydrogen Bonds for Cd(SO <sub>3</sub> NH <sub>2</sub> ) <sub>2</sub> .....                                                      | <b>S9</b>  |
| <b>Table S7.</b> The direction and magnitude of the dipole moments in the [CdO <sub>6</sub> ] .....                                              | <b>S10</b> |
| <b>Table S8.</b> Calculated and experimental residual weight in TGA.....                                                                         | <b>S10</b> |
| <b>Table S9.</b> Weight and atomic ratios obtained from SEM-EDX.....                                                                             | <b>S10</b> |
| <b>Table S10.</b> Elemental analysis.....                                                                                                        | <b>S10</b> |
| <b>Table S11.</b> Assigned vibration peaks in IR spectra.....                                                                                    | <b>S11</b> |
| <b>Table S12.</b> Investigation on the coordination of cations for sulfamates .....                                                              | <b>S11</b> |
| <b>References</b> .....                                                                                                                          | <b>S12</b> |

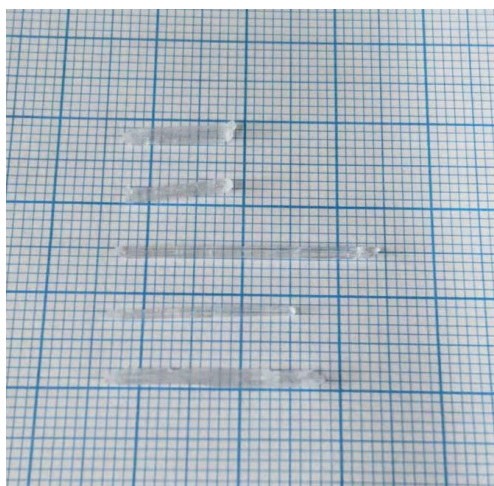

**Figure S1.** As-grown single crystals of  $\text{Cd}(\text{SO}_3\text{NH}_2)_2 \cdot 2\text{H}_2\text{O}$  with the sizes up to  $0.15 \times 0.15 \times 2.7$   $\text{cm}^3$ .

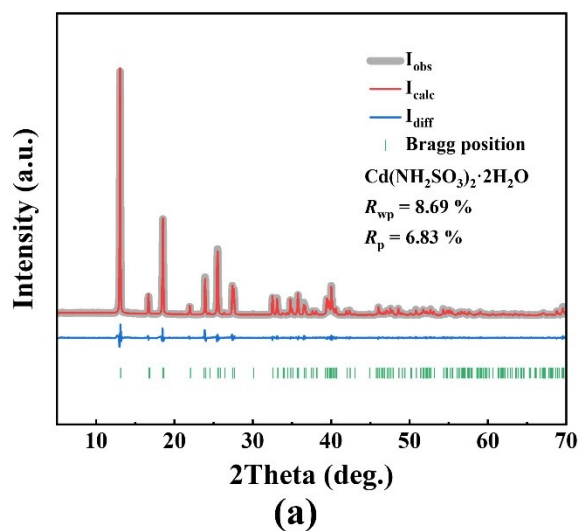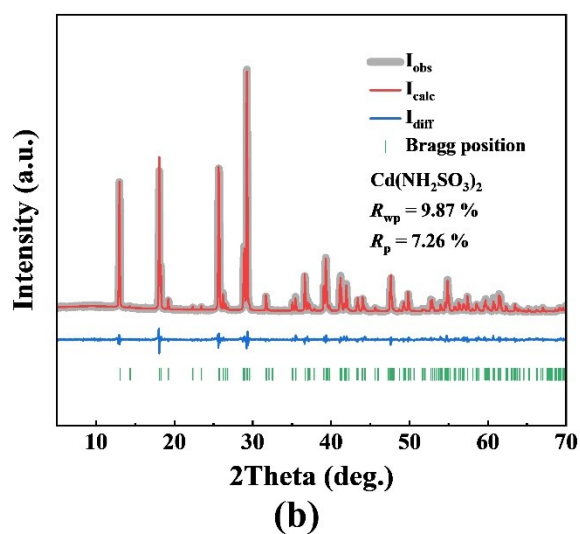

**Figure S2.** Rietveld refinements results for (a)  $\text{Cd}(\text{SO}_3\text{NH}_2)_2 \cdot 2\text{H}_2\text{O}$  and (b)  $\text{Cd}(\text{SO}_3\text{NH}_2)_2$ .

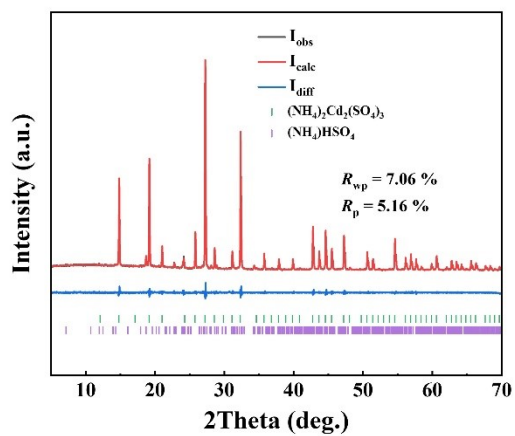

(a)

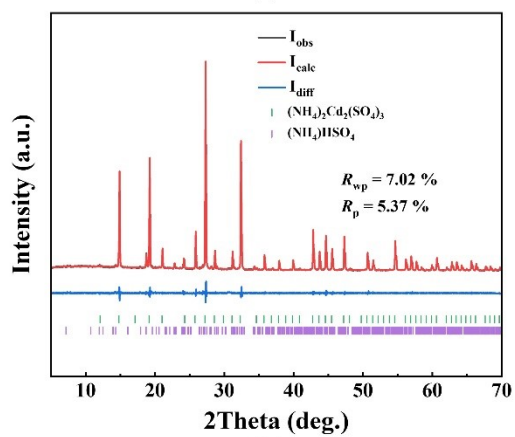

(b)

**Figure S3.** Pawley phase fitting for the annealed (a)  $\text{Cd}(\text{SO}_3\text{NH}_2)_2 \cdot 2\text{H}_2\text{O}$  and (b)  $\text{Cd}(\text{SO}_3\text{NH}_2)_2$  samples at 250 °C for 12 h.

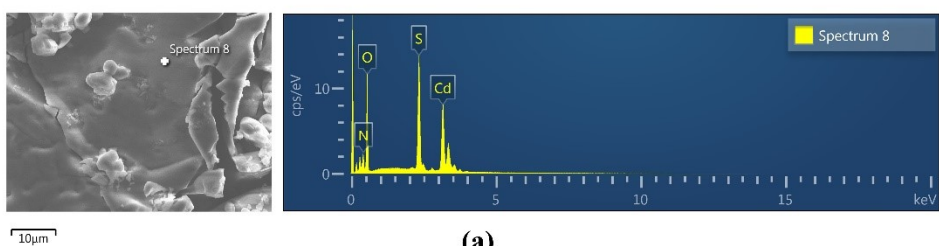

(a)

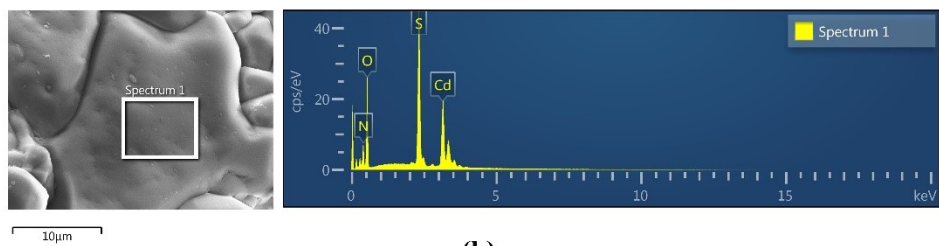

(b)

**Figure S4.** SEM-EDX for (a)  $\text{Cd}(\text{SO}_3\text{NH}_2)_2 \cdot 2\text{H}_2\text{O}$  and (b)  $\text{Cd}(\text{SO}_3\text{NH}_2)_2$ .

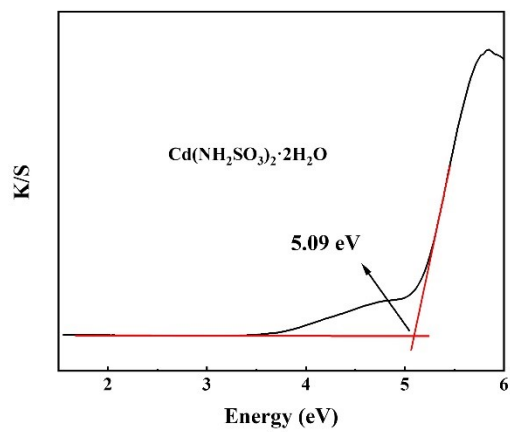

(a)

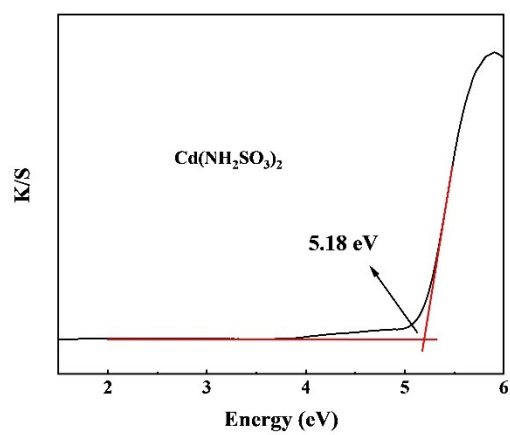

(b)

**Figure S5.** Experimental band gap obtained from the converted UV-vis spectra by using Kubelka-Munk function for (a)  $\text{Cd}(\text{SO}_3\text{NH}_2)_2 \cdot 2\text{H}_2\text{O}$  and (b)  $\text{Cd}(\text{SO}_3\text{NH}_2)_2$ .

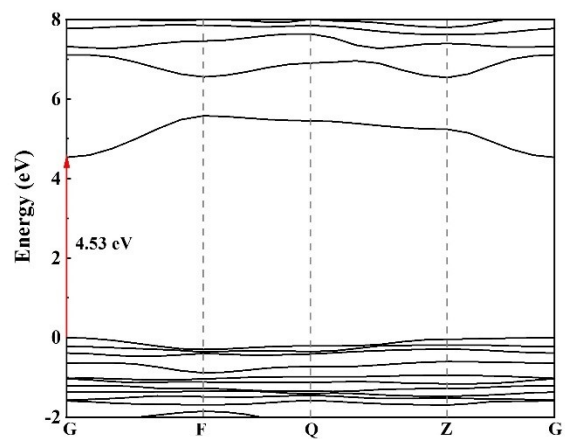

(a)

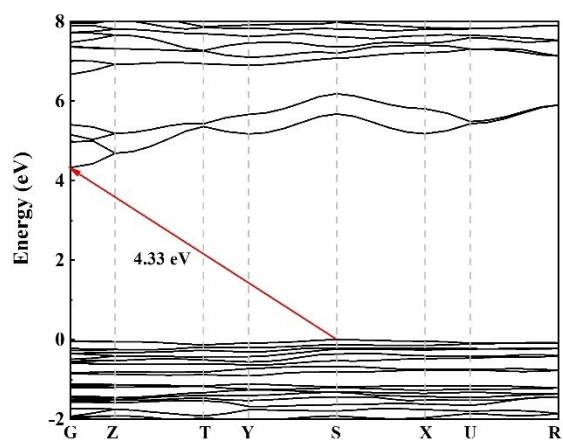

(b)

**Figure S6.** Electronic band structures for (a)  $\text{Cd}(\text{SO}_3\text{NH}_2)_2 \cdot 2\text{H}_2\text{O}$  and (b)  $\text{Cd}(\text{SO}_3\text{NH}_2)_2$ .

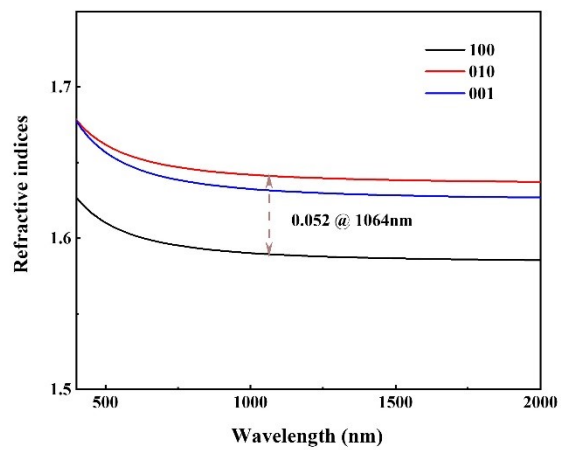

(a)

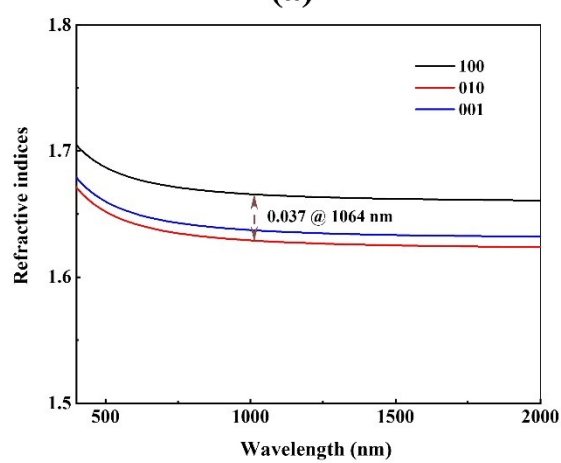

(b)

**Figure S7.** Calculated birefringence for (a) Cd(SO<sub>3</sub>NH<sub>2</sub>)<sub>2</sub>·2H<sub>2</sub>O and (b) Cd(SO<sub>3</sub>NH<sub>2</sub>)<sub>2</sub>.

**Table S1.** Crystallographic data of Cd(SO<sub>3</sub>NH<sub>2</sub>)<sub>2</sub>·2H<sub>2</sub>O and Cd(SO<sub>3</sub>NH<sub>2</sub>)<sub>2</sub>.

|                                               | Cd(SO <sub>3</sub> NH <sub>2</sub> ) <sub>2</sub> ·2H <sub>2</sub> O | Cd(SO <sub>3</sub> NH <sub>2</sub> ) <sub>2</sub>        |
|-----------------------------------------------|----------------------------------------------------------------------|----------------------------------------------------------|
| Formula weight                                | 340.60                                                               | 304.57                                                   |
| Temp/K                                        | 298.0                                                                | 298.0                                                    |
| Crystal system                                | triclinic                                                            | orthorhombic                                             |
| Space group                                   | $P\bar{1}$                                                           | $P2_12_12_1$                                             |
| $a/\text{\AA}$                                | 5.4674(5)                                                            | 6.9140(4)                                                |
| $b/\text{\AA}$                                | 5.4729(5)                                                            | 6.9380(4)                                                |
| $c/\text{\AA}$                                | 7.1520(6)                                                            | 13.5784(7)                                               |
| $\alpha/^\circ$                               | 102.547(3)                                                           | 90                                                       |
| $\beta/^\circ$                                | 103.452(3)                                                           | 90                                                       |
| $\gamma/^\circ$                               | 94.970(4)                                                            | 90                                                       |
| $V/\text{\AA}^3$                              | 201.03(3)                                                            | 651.35(6)                                                |
| $Z$                                           | 1                                                                    | 4                                                        |
| $\rho_{\text{calc}} \text{ g/cm}^3$           | 2.813                                                                | 3.106                                                    |
| $\mu/\text{mm}^{-1}$                          | 3.257                                                                | 3.980                                                    |
| $F(000)$                                      | 166.0                                                                | 584.0                                                    |
| Crystal size/ $\text{mm}^3$                   | $0.112 \times 0.101 \times 0.046$                                    | $0.114 \times 0.078 \times 0.038$                        |
| 2 theta range/ $^\circ$                       | 6.042 to 56.688                                                      | 6 to 59.172                                              |
| Index ranges                                  | $-7 \leq h \leq 7, -7 \leq k \leq 7, -9 \leq l \leq 9$               | $-9 \leq h \leq 9, -9 \leq k \leq 9, -18 \leq l \leq 18$ |
| Reflns collected                              | 9157                                                                 | 23643                                                    |
| Independent reflns                            | 1013<br>( $R_{\text{int}} = 0.0730$ )                                | 1838<br>( $R_{\text{int}} = 0.1146$ )                    |
| Data/restraints/param                         | 1013/1/72                                                            | 1838/4/117                                               |
| Goof on $F^2$                                 | 1.134                                                                | 1.110                                                    |
| $R_1^a/wR_2^b$ [ $I \geq 2\sigma(I)$ ]        | 0.0349/0.0536                                                        | 0.0399/0.0757                                            |
| $R_1^a/wR_2^b$ [all data]                     | 0.0439/0.0558                                                        | 0.0462/0.0778                                            |
| Largest diff peak/hole / $e \text{ \AA}^{-3}$ | 0.79/-0.68                                                           | 1.00/-1.07                                               |
| Flack parameter                               | N/A                                                                  | 0.08(4)                                                  |

$$^aR_1 = \frac{\sum |F_o| - |F_c|}{\sum |F_o|}, \quad ^b wR_2 = \left[ \frac{\sum w(F_o^2 - F_c^2)^2}{\sum w F_o^4} \right]^{1/2}$$

**Table S2.** Fractional atomic coordinates ( $\times 10^4$ ), equivalent isotropic displacement parameters ( $\text{\AA}^2 \times 10^3$ ) and bond valence sum (BVS) for the non-H atoms in  $\text{Cd}(\text{SO}_3\text{NH}_2)_2 \cdot 2\text{H}_2\text{O}$  and  $\text{Cd}(\text{SO}_3\text{NH}_2)_2$ .  $U_{\text{eq}}$  is defined as 1/3 of the trace of the orthogonalized  $U_{ij}$  tensor.

| Atom                                                                              | <i>x</i>   | <i>y</i>   | <i>z</i>   | U(eq)     | BVS  |
|-----------------------------------------------------------------------------------|------------|------------|------------|-----------|------|
| <b><math>\text{Cd}(\text{SO}_3\text{NH}_2)_2 \cdot 2\text{H}_2\text{O}</math></b> |            |            |            |           |      |
| Cd1                                                                               | 10000      | 10000      | 5000       | 13.66(13) | 2.08 |
| S1                                                                                | 3918.5(17) | 6870.5(17) | 2396.2(13) | 13.9(2)   | 6.04 |
| O1                                                                                | 4046(5)    | 9022(5)    | 1561(4)    | 23.1(6)   | 1.67 |
| O2                                                                                | 2980(5)    | 7302(5)    | 4183(4)    | 19.6(6)   | 1.54 |
| O3                                                                                | 2658(5)    | 4529(5)    | 988(4)     | 22.9(6)   | 1.61 |
| O4                                                                                | 10695(5)   | 8523(6)    | 7752(4)    | 25.2(7)   | 0.39 |
| N1                                                                                | 6980(6)    | 6499(7)    | 3237(5)    | 16.2(7)   | 1.59 |
| <b><math>\text{Cd}(\text{SO}_3\text{NH}_2)_2</math></b>                           |            |            |            |           |      |
| Cd1                                                                               | 7617.4(7)  | -208.8(7)  | 1946.5(4)  | 11.50(16) | 2.09 |
| S1                                                                                | 7039(2)    | 79(3)      | 4455.4(12) | 11.3(4)   | 6.05 |
| S2                                                                                | 7528(2)    | 4979(2)    | 2316.6(12) | 11.7(3)   | 6.14 |
| O1                                                                                | 5400(9)    | -1012(10)  | 4795(4)    | 22.3(14)  | 1.65 |
| O2                                                                                | 7947(8)    | -799(8)    | 3583(4)    | 18.2(12)  | 1.87 |
| O3                                                                                | 6719(10)   | 2123(9)    | 4346(5)    | 22.1(14)  | 1.63 |
| O4                                                                                | 5590(8)    | 5271(11)   | 2691(4)    | 23.4(13)  | 1.96 |
| O5                                                                                | 7845(9)    | 3118(8)    | 1882(4)    | 19.0(13)  | 1.99 |
| O6                                                                                | 8176(9)    | 6556(9)    | 1694(4)    | 17.2(14)  | 1.93 |
| N1                                                                                | 8664(9)    | -94(10)    | 5366(5)    | 13.8(13)  | 1.63 |
| N2                                                                                | 9009(9)    | 5056(11)   | 3289(4)    | 13.1(13)  | 1.61 |

**Table S3.** Selected bond lengths ( $\text{\AA}$ ) and angles ( $^\circ$ ) for  $\text{Cd}(\text{SO}_3\text{NH}_2)_2 \cdot 2\text{H}_2\text{O}$ .

|                                      |            |                                      |            |
|--------------------------------------|------------|--------------------------------------|------------|
| Cd1-O2 <sup>1</sup>                  | 2.380(3)   | O4-Cd1-O4 <sup>3</sup>               | 180.0      |
| Cd1-O2 <sup>2</sup>                  | 2.380(3)   | O4 <sup>3</sup> -Cd1-N1              | 88.40(12)  |
| Cd1-O4                               | 2.252(3)   | O4-Cd1-N1 <sup>3</sup>               | 88.40(12)  |
| Cd1-O4 <sup>3</sup>                  | 2.252(3)   | O4 <sup>3</sup> -Cd1-N1 <sup>3</sup> | 91.60(12)  |
| Cd1-N1 <sup>3</sup>                  | 2.329(3)   | O4-Cd1-N1                            | 91.60(12)  |
| Cd1-N1                               | 2.329(3)   | N1-Cd1-O2 <sup>2</sup>               | 84.40(10)  |
| S1-O1                                | 1.435(3)   | N1 <sup>3</sup> -Cd1-O2 <sup>1</sup> | 84.40(10)  |
| S1-O2                                | 1.465(3)   | N1 <sup>3</sup> -Cd1-O2 <sup>2</sup> | 95.60(10)  |
| S1-O3                                | 1.447(3)   | N1-Cd1-O2 <sup>1</sup>               | 95.60(10)  |
| S1-N1                                | 1.688(3)   | N1 <sup>3</sup> -Cd1-N1              | 180.0      |
|                                      |            | O1-S1-O2                             | 114.10(17) |
| O2 <sup>2</sup> -Cd1-O2 <sup>1</sup> | 180.00(12) | O1-S1-O3                             | 114.61(17) |
| O4-Cd1-O2 <sup>2</sup>               | 82.92(10)  | O1-S1-N1                             | 104.58(18) |
| O4-Cd1-O2 <sup>1</sup>               | 97.08(10)  | O2-S1-N1                             | 103.60(17) |
| O4 <sup>3</sup> -Cd1-O2 <sup>1</sup> | 82.92(10)  | O3-S1-O2                             | 111.78(16) |
| O4 <sup>3</sup> -Cd1-O2 <sup>2</sup> | 97.08(10)  | O3-S1-N1                             | 106.99(17) |

<sup>1</sup>1-x, 2-y, 1-z; <sup>2</sup>1+x, +y, +z; <sup>3</sup>2-x, 2-y, 1-z; <sup>4</sup>-1+x, +y, +z



**Table S4.** Selected bond lengths (Å) and angles (°) for Cd(SO<sub>3</sub>NH<sub>2</sub>)<sub>2</sub>.

|                                       |          |                                       |          |
|---------------------------------------|----------|---------------------------------------|----------|
| Cd1-O6 <sup>1</sup>                   | 2.303(6) | O4 <sup>4</sup> -Cd1- N1 <sup>3</sup> | 79.5(2)  |
| Cd1-O4 <sup>4</sup>                   | 2.296(5) | O2-Cd1-O6 <sup>1</sup>                | 87.3(2)  |
| Cd1-O2                                | 2.271(5) | O2-Cd1-O4 <sup>4</sup>                | 85.0(2)  |
| Cd1-O5                                | 2.315(6) | O2-Cd1-O5                             | 102.1(2) |
| Cd1-N2 <sup>2</sup>                   | 2.362(6) | O2-Cd1-N2 <sup>2</sup>                | 92.7(2)  |
| Cd1-N1 <sup>3</sup>                   | 2.330(6) | O2-Cd1-N1 <sup>3</sup>                | 162.8(2) |
| S2-O6                                 | 1.453(6) | O5-Cd1-N2 <sup>2</sup>                | 81.4(2)  |
| S2-O4                                 | 1.447(6) | O5-Cd1-N1 <sup>3</sup>                | 84.3(2)  |
| S2-O5                                 | 1.437(6) | N1 <sup>3</sup> -Cd1-N2 <sup>2</sup>  | 104.1(2) |
| S2-N2                                 | 1.672(6) | O6-S2-N2                              | 104.3(4) |
| S1-O2                                 | 1.472(5) | O4-S2-O6                              | 112.6(4) |
| S1-O3                                 | 1.443(6) | O4-S2-N2                              | 106.6(3) |
| S1-O1                                 | 1.439(6) | O5-S2-O6                              | 113.0(4) |
| S1-N1                                 | 1.675(6) | O5-S2-O4                              | 114.3(4) |
|                                       |          | O5-S2-N2                              | 105.0(4) |
| O6 <sup>1</sup> -Cd1-O5               | 162.7(2) | O2-S1-N1                              | 106.2(3) |
| O6 <sup>1</sup> -Cd1-N2 <sup>2</sup>  | 83.7(3)  | O3-S1-O2                              | 112.9(3) |
| O6 <sup>1</sup> -Cd1-N1 <sup>3</sup>  | 90.8(2)  | O3-S1-N1                              | 104.4(4) |
| O4 <sup>4</sup> -Cd1-O6 <sup>1</sup>  | 109.6(2) | O1-S1-O2                              | 112.1(4) |
| O4 <sup>4</sup> -Cd1-O5               | 85.9(2)  | O1-S1-O3                              | 115.4(4) |
| O4 <sup>4</sup> -Cd1- N2 <sup>2</sup> | 166.4(2) | O1-S1-N1                              | 104.7(4) |

<sup>1</sup>+x, -1+y, +z; <sup>2</sup>2-x, -1/2+y, 1/2-z; <sup>3</sup>3/2-x, -y, -1/2+z; <sup>4</sup>1-x, -1/2+y, 1/2-z; <sup>5</sup>+x, 1+y, +z; <sup>6</sup>1-x, 1/2+y, 1/2-z; <sup>7</sup>2-x, 1/2+y, 1/2-z; <sup>8</sup>3/2-x, -y, 1/2+z

**Table S5.** Hydrogen Bonds for Cd(SO<sub>3</sub>NH<sub>2</sub>)<sub>2</sub>·2H<sub>2</sub>O.

| D-H...A                 | d <sub>D-H</sub> (Å) | d <sub>H-A</sub> (Å) | d <sub>D-A</sub> (Å) |
|-------------------------|----------------------|----------------------|----------------------|
| O4-H1...O3 <sup>2</sup> | 0.85                 | 1.99                 | 2.803(4)             |
| O4-H2...O1 <sup>1</sup> | 0.85                 | 2.07                 | 2.849(4)             |
| O4-H2...O1 <sup>3</sup> | 0.85                 | 2.40                 | 2.950(4)             |
| N1-H3...O3 <sup>4</sup> | 0.85(5)              | 2.22(5)              | 3.008(4)             |
| N1-H4...O2 <sup>1</sup> | 0.82(6)              | 2.25(6)              | 3.064(5)             |

<sup>1</sup>1-x, 2-y, 1-z; <sup>2</sup>1+x, +y, +z; <sup>3</sup>2-x, 2-y, 1-z; <sup>4</sup>-1+x, +y, +z

**Table S6.** Hydrogen Bonds for Cd(SO<sub>3</sub>NH<sub>2</sub>)<sub>2</sub>.

| D-H...A                  | d <sub>D-H</sub> (Å) | d <sub>H-A</sub> (Å) | d <sub>D-A</sub> (Å) |
|--------------------------|----------------------|----------------------|----------------------|
| N1-H1A...O3 <sup>1</sup> | 0.85(3)              | 2.19(5)              | 2.977(9)             |
| N2-H2A...O3              | 0.85(3)              | 2.16(5)              | 2.951(9)             |
| N1-H1B...O1 <sup>2</sup> | 0.85(3)              | 2.13(3)              | 2.965(9)             |
| N2-H2B...O5 <sup>3</sup> | 0.85(3)              | 2.37(13)             | 3.049(9)             |

<sup>1</sup>1/2+x, 1/2-y, 1-z; <sup>2</sup>1/2+x, -1/2-y, 1-z; <sup>3</sup>2-x, 1/2+y, 1/2-z

**Table S7.** The direction and magnitude of the dipole moments in the  $[\text{CdO}_6]$  for  $\text{Cd}(\text{SO}_3\text{NH}_2)_2 \cdot 2\text{H}_2\text{O}$  and  $\text{Cd}(\text{SO}_3\text{NH}_2)_2$

| Compound                                                        | species                   | x (a)   | y (b)  | z (c)   | magnitude |                                                |
|-----------------------------------------------------------------|---------------------------|---------|--------|---------|-----------|------------------------------------------------|
|                                                                 |                           |         |        |         | debye     | $10^{-4}\text{esu}\cdot\text{cm}/\text{\AA}^3$ |
| $\text{Cd}(\text{SO}_3\text{NH}_2)_2 \cdot 2\text{H}_2\text{O}$ | $\text{Cd1O}_4\text{N}_2$ | 0       | 0      | 0       | 0         | 0                                              |
| $\text{Cd}(\text{SO}_3\text{NH}_2)_2$                           | $\text{Cd1O}_4\text{N}_2$ | -0.3495 | 0.9054 | -0.1302 | 0.9792    | 60                                             |

**Table S8.** Calculated and experimental residual weight for  $\text{Cd}(\text{SO}_3\text{NH}_2)_2 \cdot 2\text{H}_2\text{O}$  and  $\text{Cd}(\text{SO}_3\text{NH}_2)_2$  in TGA.

| Temperature (°C) | Product                               | $\text{Cd}(\text{SO}_3\text{NH}_2)_2 \cdot 2\text{H}_2\text{O}$ |          | $\text{Cd}(\text{SO}_3\text{NH}_2)_2$ |          |
|------------------|---------------------------------------|-----------------------------------------------------------------|----------|---------------------------------------|----------|
|                  |                                       | Cal. (%)                                                        | Exp. (%) | Cal. (%)                              | Exp. (%) |
| 135              | $\text{Cd}(\text{SO}_3\text{NH}_2)_2$ | 89.42                                                           | 90.68    | 100                                   | 100      |
| 650              | $\text{CdSO}_4$                       | 61.20                                                           | 60.04    | 68.44                                 | 67.83    |

**Table S9.** Weight and atomic ratios for (a)  $\text{Cd}(\text{SO}_3\text{NH}_2)_2 \cdot 2\text{H}_2\text{O}$  and (b)  $\text{Cd}(\text{SO}_3\text{NH}_2)_2$  obtained from SEM-EDX.

| Element      | $\text{Cd}(\text{SO}_3\text{NH}_2)_2 \cdot 2\text{H}_2\text{O}$ |          | $\text{Cd}(\text{SO}_3\text{NH}_2)_2$ |          |
|--------------|-----------------------------------------------------------------|----------|---------------------------------------|----------|
|              | Wt %                                                            | Atomic % | Wt %                                  | Atomic % |
| Cd           | 32.47                                                           | 7.04     | 29.69                                 | 6.29     |
| S            | 14.41                                                           | 10.96    | 17.41                                 | 12.94    |
| O            | 48.24                                                           | 73.51    | 43.62                                 | 64.97    |
| N            | 4.88                                                            | 8.50     | 9.29                                  | 15.80    |
| <b>Total</b> | 100                                                             |          | 100                                   |          |

**Table S10.** Elemental analysis for  $\text{Cd}(\text{SO}_3\text{NH}_2)_2 \cdot 2\text{H}_2\text{O}$  and  $\text{Cd}(\text{SO}_3\text{NH}_2)_2$ .

| Element | $\text{Cd}(\text{SO}_3\text{NH}_2)_2 \cdot 2\text{H}_2\text{O}$ |          | $\text{Cd}(\text{SO}_3\text{NH}_2)_2$ |          |
|---------|-----------------------------------------------------------------|----------|---------------------------------------|----------|
|         | Cal. (%)                                                        | Exp. (%) | Cal. (%)                              | Exp. (%) |
| S       | 18.83                                                           | 19.6074  | 21.06                                 | 21.5858  |
| N       | 8.22                                                            | 8.7123   | 9.20                                  | 9.5022   |
| H       | 2.37                                                            | 2.3893   | 1.32                                  | 1.3512   |

**Table S11.** Assigned vibration peaks for Cd(SO<sub>3</sub>NH<sub>2</sub>)<sub>2</sub>·2H<sub>2</sub>O and Cd(SO<sub>3</sub>NH<sub>2</sub>)<sub>2</sub>.

| Functional group | Vibration type                          | Cd(SO <sub>3</sub> NH <sub>2</sub> ) <sub>2</sub> ·2H <sub>2</sub> O | Cd(SO <sub>3</sub> NH <sub>2</sub> ) <sub>2</sub> |
|------------------|-----------------------------------------|----------------------------------------------------------------------|---------------------------------------------------|
|                  |                                         | Wavenumber (cm <sup>-1</sup> )                                       |                                                   |
| H <sub>2</sub> O | stretching                              | 3441, 3368                                                           |                                                   |
| NH <sub>2</sub>  | stretching                              | 3210, 3175, 3053                                                     | 3222, 3172, 3079                                  |
| H <sub>2</sub> O | bending                                 | 1622                                                                 |                                                   |
| NH <sub>2</sub>  | bending                                 | 1532                                                                 | 1558, 1542                                        |
| SO <sub>3</sub>  | Antisymmetric and symmetric stretching  | 1278, 1198, 1096, 1045                                               | 1300, 1265, 1235, 1194, 1079, 1050, 1027          |
| NH <sub>2</sub>  | rocking and wagging                     | 1149                                                                 | 1151                                              |
| S-N              |                                         | 773                                                                  | 779                                               |
| SO <sub>3</sub>  | Antisymmetric and symmetric deformation | 651                                                                  | 645                                               |

**Table S12.** Investigation on the coordination of cations for sulfamates and the M-N (M = metal cations) bond lengths.

| Compound                                                                                  | MO <sub>x</sub> polyhedra                                        | M-N bond length (Å)  |
|-------------------------------------------------------------------------------------------|------------------------------------------------------------------|----------------------|
| Li(NH <sub>2</sub> SO <sub>3</sub> ) <sup>1</sup>                                         | [LiO <sub>4</sub> ]                                              |                      |
| Na(NH <sub>2</sub> SO <sub>3</sub> ) <sup>2</sup>                                         | [NaO <sub>6</sub> ]                                              |                      |
| Cs(NH <sub>2</sub> SO <sub>3</sub> ) ( <i>Pnma</i> ) <sup>3</sup>                         | [CsO <sub>7</sub> ]                                              |                      |
| Mg(NH <sub>2</sub> SO <sub>3</sub> ) <sub>2</sub> ·4H <sub>2</sub> O <sup>4</sup>         | [MgO <sub>6</sub> ]                                              |                      |
| Mg(NH <sub>2</sub> SO <sub>3</sub> ) <sub>2</sub> ·3H <sub>2</sub> O <sup>4</sup>         | [MgO <sub>6</sub> ]                                              |                      |
| Ca(NH <sub>2</sub> SO <sub>3</sub> ) <sub>2</sub> ·4H <sub>2</sub> O <sup>4</sup>         | [CaO <sub>8</sub> ]                                              |                      |
| Ca(NH <sub>2</sub> SO <sub>3</sub> ) <sub>2</sub> ·H <sub>2</sub> O <sup>4</sup>          | [CaO <sub>7</sub> ]                                              |                      |
| Sr(NH <sub>2</sub> SO <sub>3</sub> ) <sub>2</sub> ·4H <sub>2</sub> O <sup>4</sup>         | [SrO <sub>8</sub> ]                                              |                      |
| Sr(NH <sub>2</sub> SO <sub>3</sub> ) <sub>2</sub> ·H <sub>2</sub> O <sup>4</sup>          | [SrO <sub>9</sub> ]                                              |                      |
| Sr(NH <sub>2</sub> SO <sub>3</sub> ) <sub>2</sub> ( <i>Pc</i> ) <sup>4, 5</sup>           | [SrO <sub>9</sub> ]                                              |                      |
| LiCs(NH <sub>2</sub> SO <sub>3</sub> ) <sub>2</sub> <sup>6</sup>                          | [LiO <sub>4</sub> ] + [CsO <sub>8</sub> ]                        |                      |
| K(NH <sub>2</sub> SO <sub>3</sub> ) <sup>7</sup>                                          | [KO <sub>6</sub> N <sub>2</sub> ]                                | K-N: 3.082           |
| LiK(NH <sub>2</sub> SO <sub>3</sub> ) <sub>2</sub> <sup>6</sup>                           | [LiO <sub>4</sub> ] + [KO <sub>8</sub> N]                        | K-N: 2.901           |
| KNO <sub>3</sub> SO <sub>3</sub> NH <sub>3</sub> <sup>8</sup>                             | [KO <sub>8</sub> N]                                              | K-N: 3.332           |
| Rb(NH <sub>2</sub> SO <sub>3</sub> ) <sup>9</sup>                                         | [RbO <sub>7</sub> N <sub>2</sub> ]                               | Rb-N: 3.172, 3.280   |
| LiRb(NH <sub>2</sub> SO <sub>3</sub> ) <sub>2</sub> <sup>6</sup>                          | [LiO <sub>4</sub> ] + [RbO <sub>9</sub> ] + [RbO <sub>9</sub> N] | Rb-N: 3.135          |
| Cs(NH <sub>2</sub> SO <sub>3</sub> ) ( <i>P2<sub>1</sub>/c</i> ) <sup>3</sup>             | [CsO <sub>8</sub> N]                                             | Cs-N: 3.376          |
| Sr(NH <sub>2</sub> SO <sub>3</sub> ) <sub>2</sub> ( <i>P2<sub>1</sub></i> ) <sup>4</sup>  | [SrO <sub>8</sub> N]                                             | Sr-N: 2.982          |
| Ba(NH <sub>2</sub> SO <sub>3</sub> ) <sub>2</sub> <sup>4, 5</sup>                         | [BaO <sub>10</sub> N]                                            | Ba-N: 3.126 or 3.117 |
| Cd(NH <sub>2</sub> SO <sub>3</sub> ) <sub>2</sub> ·2H <sub>2</sub> O <sup>This work</sup> | [CdO <sub>4</sub> N <sub>2</sub> ]                               | Cd-N: 2.329          |
| Cd(NH <sub>2</sub> SO <sub>3</sub> ) <sub>2</sub> <sup>This work</sup>                    | [CdO <sub>4</sub> N <sub>2</sub> ]                               | Cd-N: 2.330, 2.362   |

## References

- 1 J. Stade, P. Held and L. Bohatý, Crystal growth, crystal structure and physical properties of lithium sulfamate  $\text{Li}[\text{NH}_2\text{SO}_3]$ , *Cryst. Res. Technol.*, 2001, **36**, 347-360.
- 2 R. Manickavachagam and R. K. Rajaram, Crystal structure of anhydrous sodium sulphamate, *Z. Kristallogr. Cryst. Mater.*, 1984, **168**, 179-186.
- 3 T. Fukami, T. Kyan, K. Nakano and R. H. Chen, Crystal structure and phase transition of single crystalline  $\text{CsNH}_2\text{SO}_3$ , *Crys. Res. Technol.*, 2011, **46**, 287-291.
- 4 P. Gross, Y. Zhang, L. Bayarjargal, B. Winkler and H. A. Höpfe, New alkaline-earth amidosulfates and their unexpected decomposition to  $\text{S}_4\text{N}_4$ , *Dalton Trans.*, 2022, **51**, 11737-11746.
- 5 X. Hao, M. Luo, C. Lin, G. Peng, F. Xu and N. Ye,  $\text{M}(\text{NH}_2\text{SO}_3)_2$  (M= Sr, Ba): two deep-ultraviolet transparent sulfamates exhibiting strong second harmonic generation responses and moderate birefringence, *Angew. Chem. Int. Ed.*, 2021, **60**, 7621-7625.
- 6 A. Meinhart, E. Haussühl, L. Bohatý and E. Tillmanns, Crystal structures of sulfamates  $\text{MeLi}(\text{NH}_2\text{SO}_3)_2$  (Me: K, Rb and Cs) and physical properties of  $\text{KLi}(\text{NH}_2\text{SO}_3)_2$  (refractive indices, thermal expansion, elastic properties), *Z. Kristallogr. Cryst. Mater.*, 2001, **216**, 513 - 521.
- 7 T. M. S. G. W. Cox, V. M. Padmanabhan, N. T. Ban, M. K. Chung and A. J. Surjadi, A neutron diffraction study of potassium sulphamate,  $\text{KSO}_3\text{NH}_2$ , *Acta Cryst.*, 1967, **23**, 578-581.
- 8 H. Tian, C. Lin, X. Zhao, S. Fang, H. Li, C. Wang, N. Ye and M. Luo, Design of a new ultraviolet nonlinear optical material  $\text{KNO}_3\text{SO}_3\text{NH}_3$  exhibiting an unexpected strong second harmonic generation response, *Mater. Today Phys.*, 2022, **28**, 100849.
- 9 J. Schreuer, Crystal structure of rubidium sulfamate,  $\text{RbH}_2\text{NSO}_3$ , *Z. Kristallogr. New Cryst. Struct.*, 1999, **214**, 305-305.
